# Supplementary material for: Exposure to synthetic hydraulic fracturing waste influences the mucosal bacterial community structure of the brook trout (Salvelinus fontinalis) epidermis
Source: AIMS Microbiol. 2018 Jun 11;4(3):413–27. doi: 10.3934/microbiol.2018.3.413 (PMC6604949; doi:10.3934/microbiol.2018.3.413)
Supplement: Supplementary file 1 [file microbiol-04-03-413-s1.pdf]

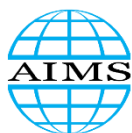

---

*Research article*

**Exposure to synthetic hydraulic fracturing waste influences the mucosal bacterial community structure of the brook trout (*Salvelinus fontinalis*) epidermis**

**Heather Galbraith<sup>1,\*</sup>, Deborah Iwanowicz<sup>2</sup>, Daniel Spooner<sup>1,3</sup>, Luke Iwanowicz<sup>2</sup>, David Keller<sup>4</sup>, Paula Zelanko<sup>3</sup> and Cynthia Adams<sup>2</sup>**

<sup>1</sup> U.S. Geological Survey, Leetown Science Center, Northern Appalachian Research Laboratory, 176 Straight Run Road, Wellsboro, PA, USA

<sup>2</sup> U.S. Geological Survey, Leetown Science Center, National Fish Health Research Laboratory, 11649 Leetown Road, Kearneysville, WV, USA

<sup>3</sup> George Mason University, Department of Environmental Science and Policy, 4400 University Drive, Fairfax, VA, USA

<sup>4</sup> The Academy of Natural Sciences of Drexel University, 1900 Benjamin Franklin Pkwy, Philadelphia, PA, USA

\* **Correspondence:** Email: [hgalbraith@usgs.gov](mailto:hgalbraith@usgs.gov); Tel: +5707243322230; Fax: +5707242525.

---

## Supplementary

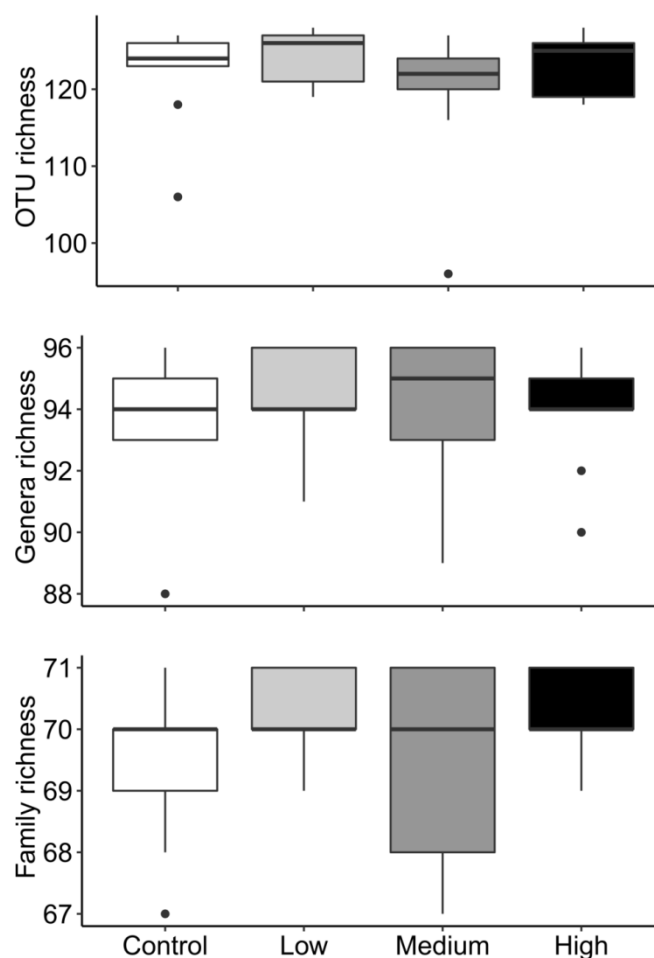

**Figure S1.** Box and whisker plots illustrating taxonomic richness for 4 experimental hydraulic fracturing waste treatments (control, low, medium and high). Note differences in y-axis scales.

**Table S1.** Statistical output comparing brook trout epidermal bacterial community structure (Analysis of Similarity, ANOSIM; Community Richness ANOVA; and Shannon-Weaver Diversity ANOVA) across 4 experimental hydraulic fracturing waste treatments (control, low, medium, and high) and at three taxonomic levels (OTUs, genus, and family). Bold and italicized text represents significant differences among treatments.

| Community metric                 | Day | OTU Test statistic     | P-value             | Genus Test statistic                       | P-value             | Family Test statistic                      | P-value             |
|----------------------------------|-----|------------------------|---------------------|--------------------------------------------|---------------------|--------------------------------------------|---------------------|
| Analysis of Similarity (ANOSIM)  | 15  | <b><i>R = 0.28</i></b> | <b><i>0.001</i></b> | <b><i>R = 0.17</i></b>                     | <b><i>0.001</i></b> | <b><i>R = 0.12</i></b>                     | <b><i>0.002</i></b> |
| Richness (ANOVA)                 | 15  | $F_{3,32} = 1.06$      | 0.38                | $F_{3,32} = 0.27$                          | 0.84                | $F_{3,32} = 0.99$                          | 0.41                |
| Shannon-Weaver Diversity (ANOVA) | 15  | $F_{3,32} = 1.21$      | 0.32                | <b><i><math>F_{3,32} = 4.17</math></i></b> | <b><i>0.01</i></b>  | <b><i><math>F_{3,32} = 6.29</math></i></b> | <b><i>0.001</i></b> |

**Table S2.** Ranges of ammonium and nitrite concentrations in 4 hydraulic fracturing waste treatments and the flow-through holding tank on day 13 of experimental exposure.

| Treatment                   | Ammonium (mg NH <sub>4</sub> <sup>+</sup> ) | Nitrite (mg NO <sub>2</sub> <sup>-</sup> ) |
|-----------------------------|---------------------------------------------|--------------------------------------------|
| Holding tank (flow through) | <0.2                                        | <0.05                                      |
| Control                     | 0.4–1.5                                     | 0.5–0.8                                    |
| Low                         | 0.8–1.5                                     | 0.2–0.8                                    |
| Medium                      | 0.8–1.0                                     | >0.8                                       |
| High                        | 1.5–2.0                                     | 0.3–0.8                                    |

**Supplemental Material A (microbiol-04-03-413-s2):** Relative sequence abundance of bacterial taxa (OTUs) from 4 HF waste exposure treatments (control, low, medium, and high) implemented by Krona software [1] (HTML files,). See Table 1 for specific treatment concentrations.

## References

1. Ondov BD, Bergman NH, Phillippy AM (2011) Interactive metagenomic visualization in a Web browser. *BMC Bioinformatics* 12: 385.

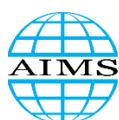

AIMS Press

© 2018 the Author(s), licensee AIMS Press. This is an open access article distributed under the terms of the Creative Commons Attribution License (<http://creativecommons.org/licenses/by/4.0>)
